# Supplementary material for: Cu-based electrode material for controlled selective electrooxidation of tetrahydroisoquinolines
Source: Royal Society of Chemistry journal article supplement (doi:10.1039/d4qi02707h), 2024-12-23
Supplement: d4qi02707h1.pdf [file d4qi02707h1.pdf]

## Supporting Information

### **Cu-based electrode material for controlled selective electrooxidation of tetrahydroisoquinoline**

Yizhou Zhang,<sup>a</sup> Rongxian Zhang,<sup>\*a</sup> Qi Zhang,<sup>a</sup> Yilin Deng,<sup>b</sup> Jiexin Guan,<sup>b</sup> Yizhou  
Ling,<sup>c</sup> and Guoxing Zhu<sup>\*a</sup>

<sup>a</sup> Chemistry and Chemical Engineering, Jiangsu University, Zhenjiang, 202013, China.

<sup>b</sup> Institute for Energy Research, Jiangsu University, Zhenjiang, 202013, China.

<sup>c</sup> School of Education Science, Nanjing Normal University, Nanjing 210097, China.

\* Corresponding authors: [rong@ujs.edu.cn](mailto:rong@ujs.edu.cn); [zhuguoxing@ujs.edu.cn](mailto:zhuguoxing@ujs.edu.cn).

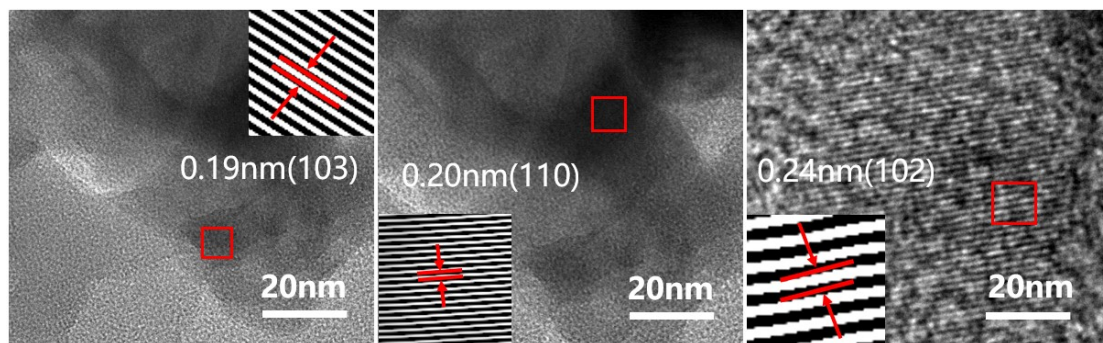

Fig. S1 TEM images of the Cu<sub>2</sub>S/NF.

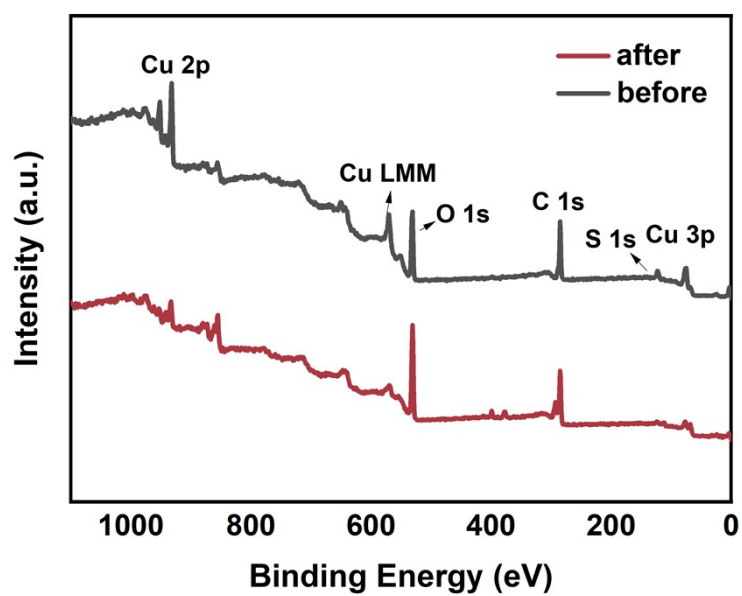

Fig. S2 XPS spectra of the Cu<sub>2</sub>S catalytic electrode before and after catalysis.

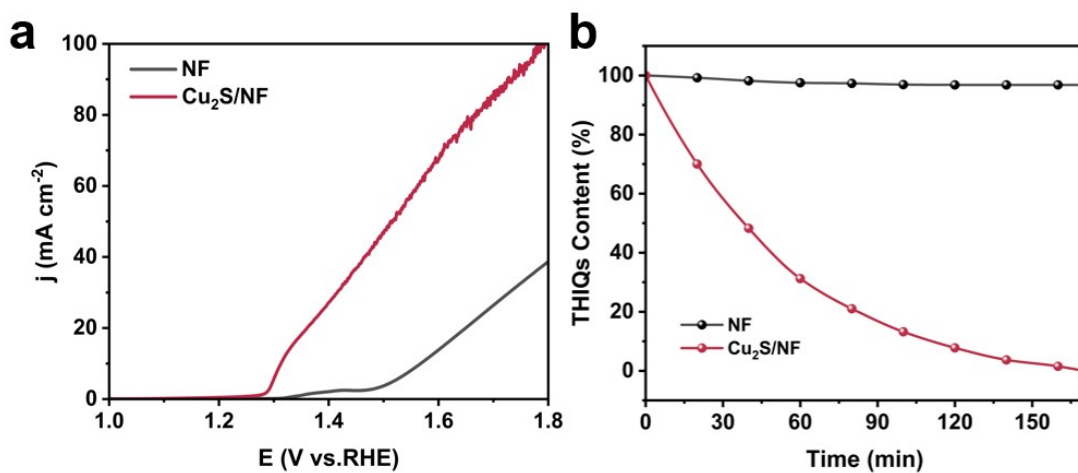

**Fig. S3** (a) LSV comparison curves of NF and Cu<sub>2</sub>S/NF; (b) Comparison curves of THIQ content between NF and Cu<sub>2</sub>S/NF.

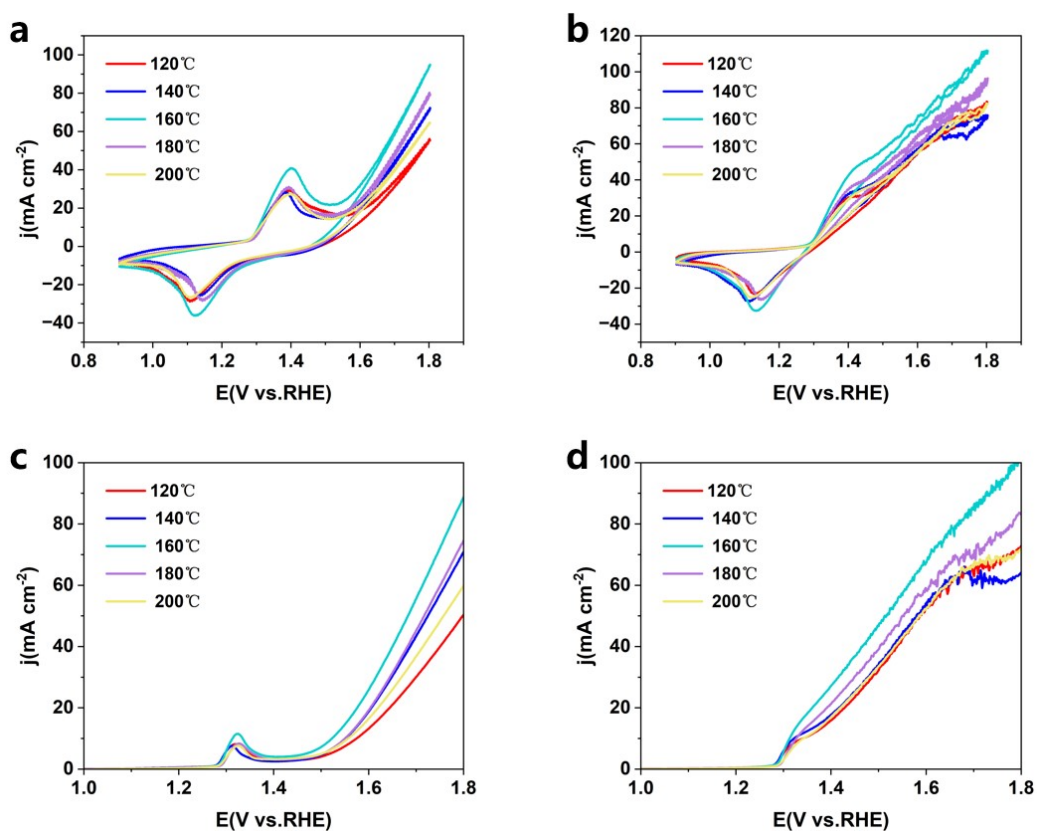

**Fig. S4** Performance of Cu<sub>2</sub>S prepared at different hydrothermal temperatures. (a) CV curves without THIQs; (b) CV curves with THIQs; (c) LSV curves without THIQs; (d) LSV curves with THIQs.

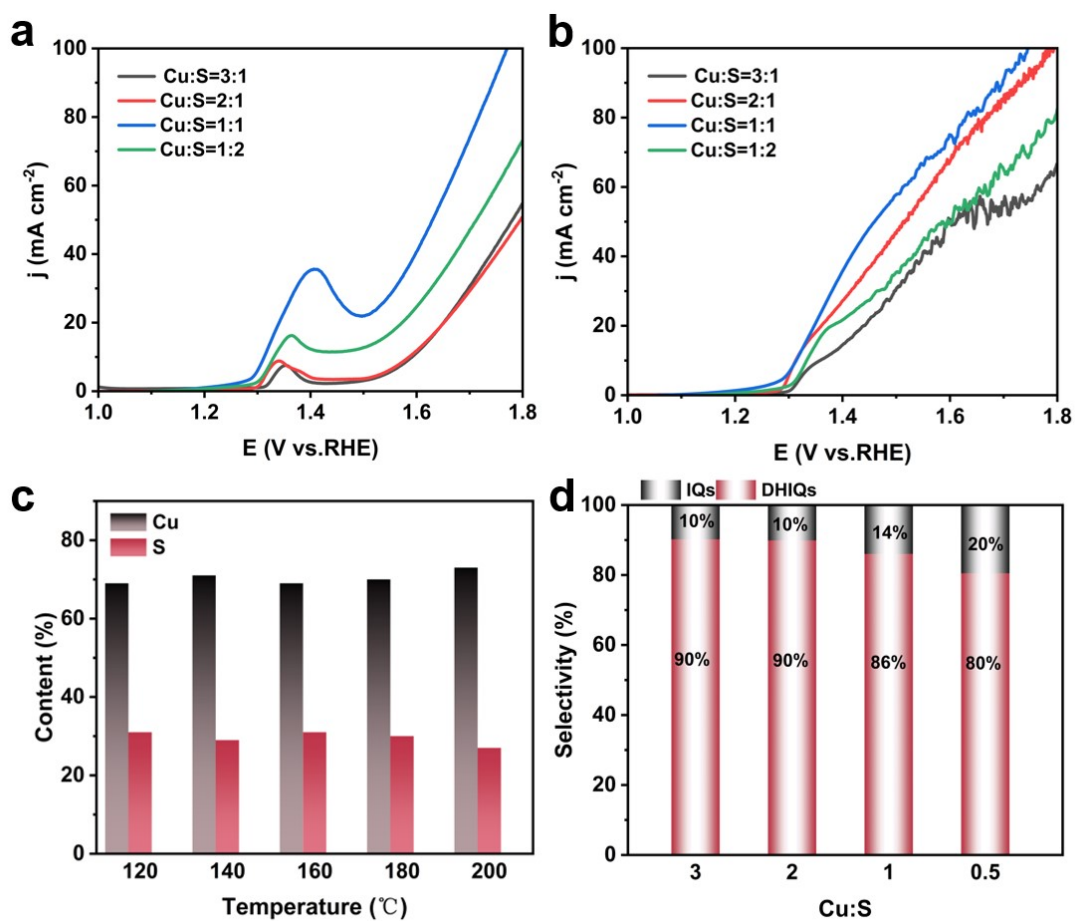

**Fig. S5** Catalytic activity of the electrodes with different Cu/S ratios. (a) LSV curves without THIQ, (b) LSV curves with THIQ. (c) Cu/S ratios of the electrodes obtained at different preparation temperatures. (d) catalytic selectivity.

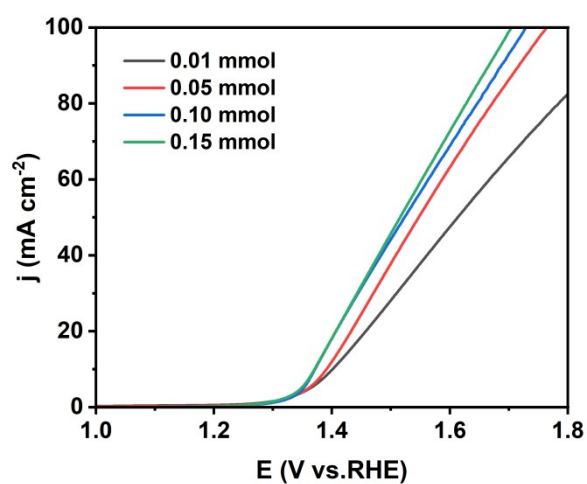

**Fig. S6** LSV curves obtained in 1.0 M KOH with different dosages of THIQs.

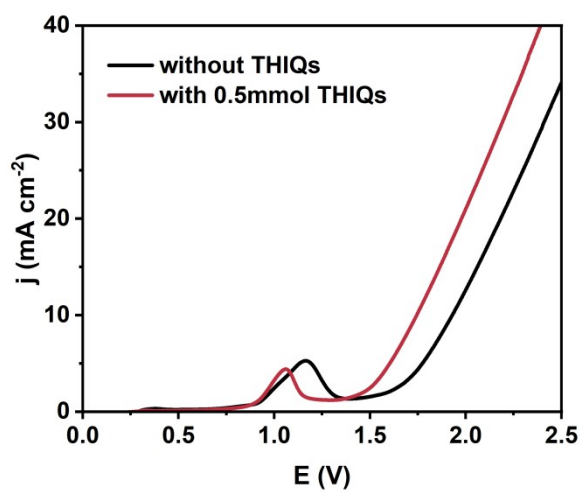

**Fig. S7** LSV curves over the Cu<sub>2</sub>S/NF||Cu<sub>2</sub>S/NF electrolyzed in the presence or absence of THIQs.

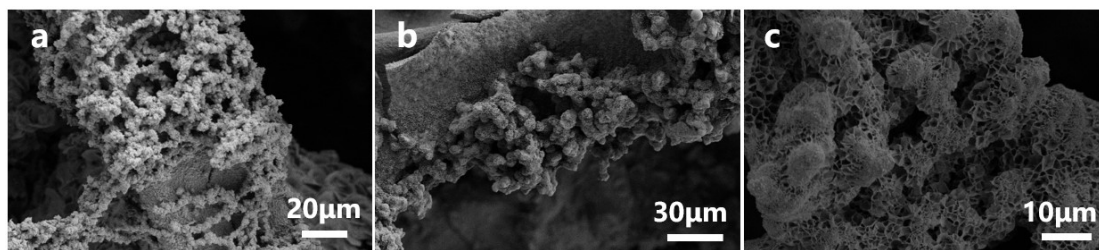

**Fig. S8** SEM images of Cu<sub>2</sub>S/NF (a) before the reaction; (b) and (c) after the reaction.

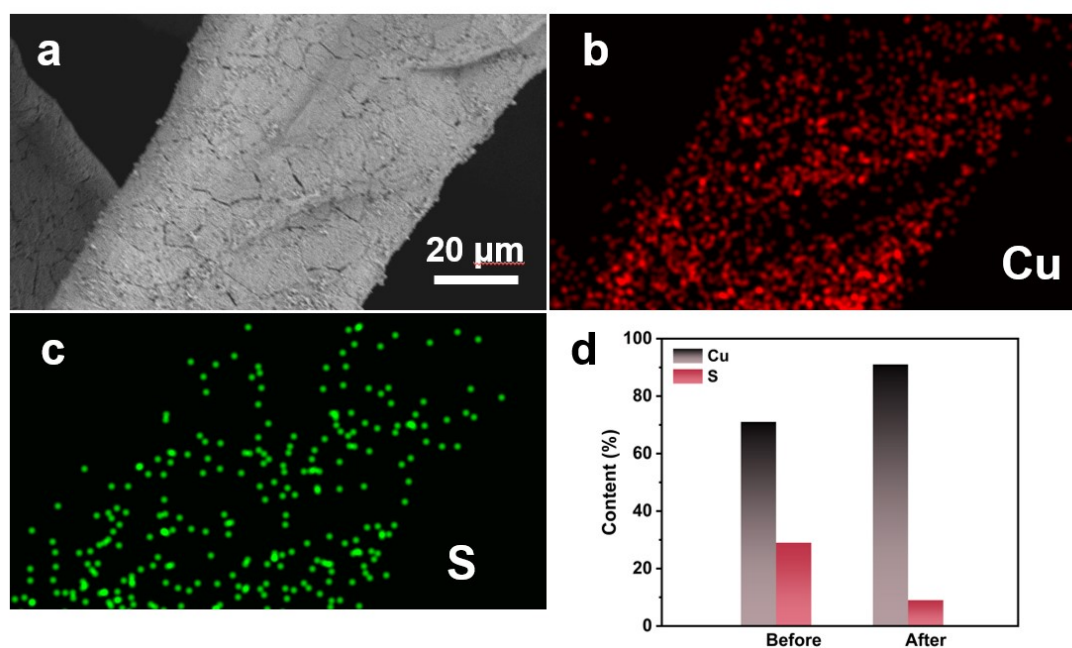

**Fig. S9** (a-c) EDS images of Cu<sub>2</sub>S/NF. (d) Cu/S ratios before and after the reaction.



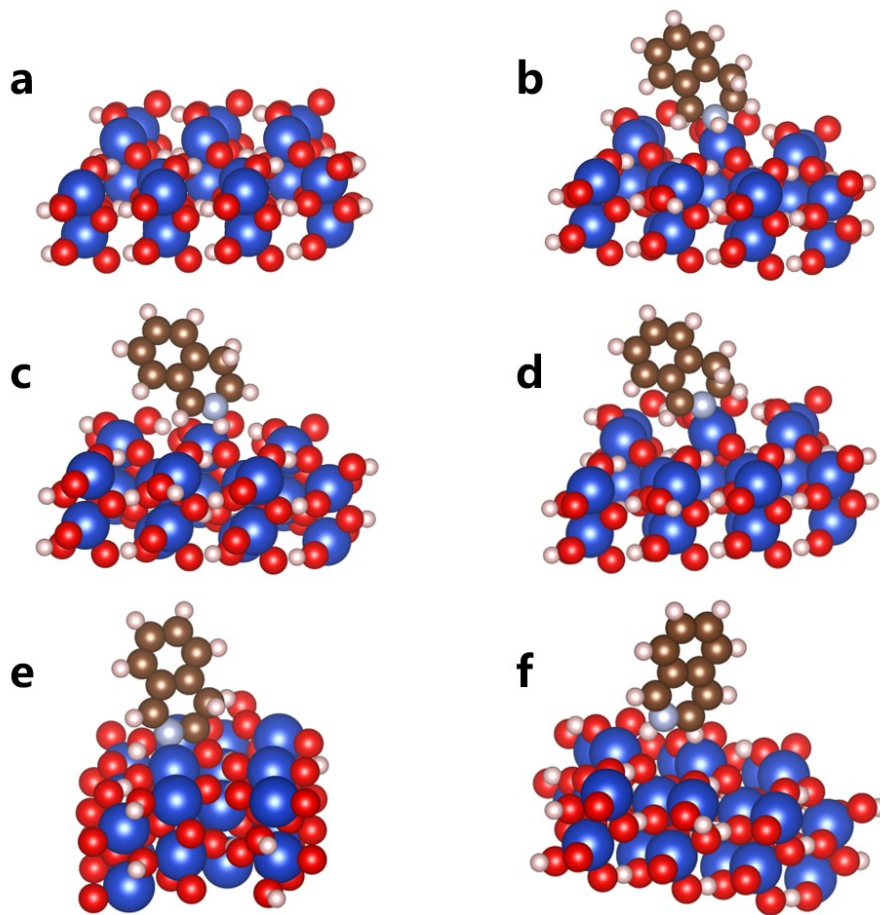

**Fig. S10** Space-filling models for (a) CuOOH; (b) CuOOH-THIQ; (c) CuOOH-THIQ<sub>ads</sub>; (d) CuOOH-DHIQ; (e) CuOOH-DHIQ<sub>ads</sub>; (f) CuOOH-IQ.

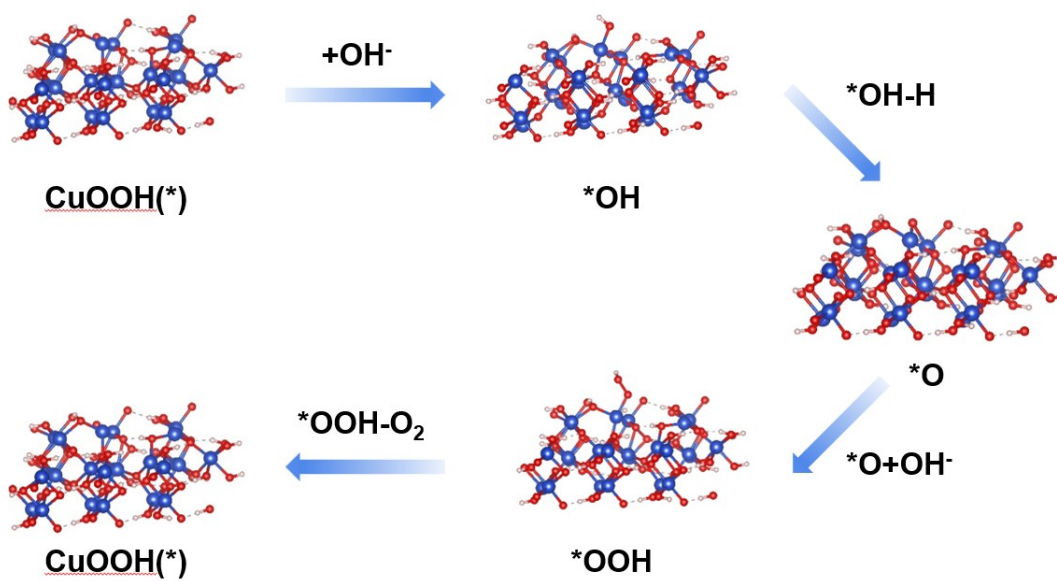

**Fig. S11** OER steps on CuOOH.

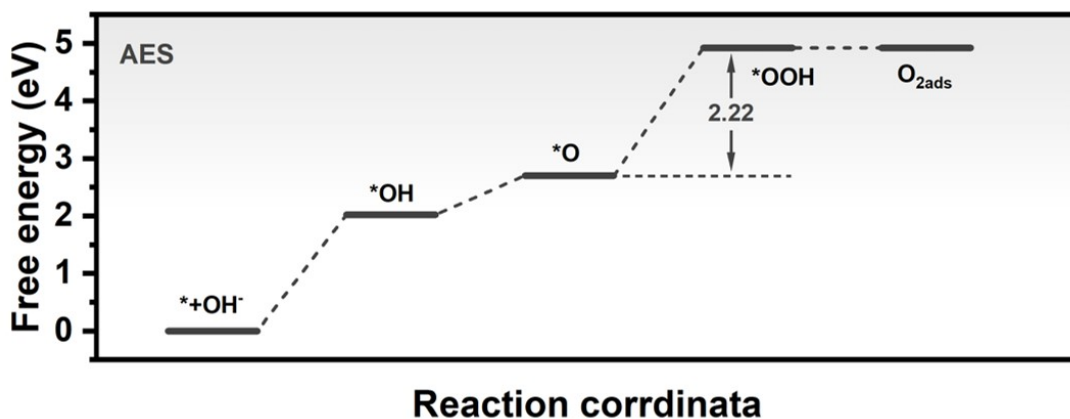

Fig. S12 Gibbs free energy of the AES reaction path of oxygen evolution reactions.

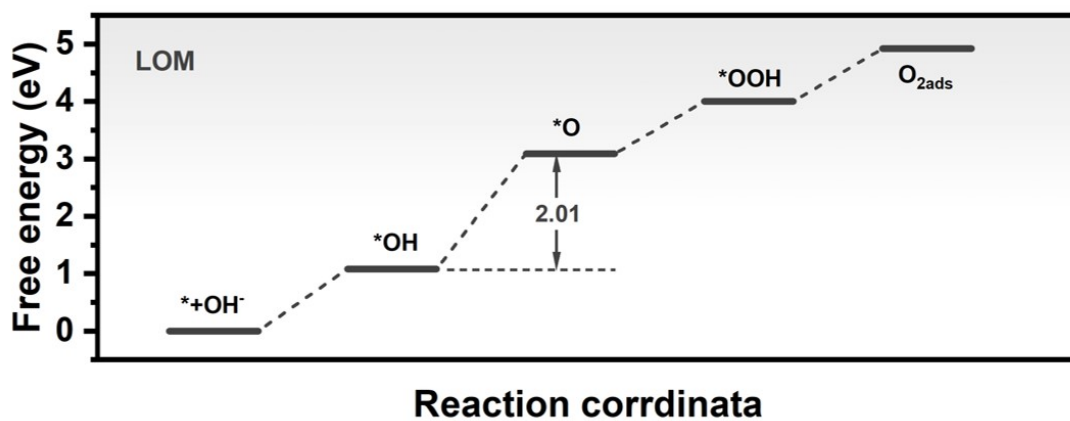

Fig. S13 Gibbs free energy of the LOM reaction path of oxygen evolution reactions.

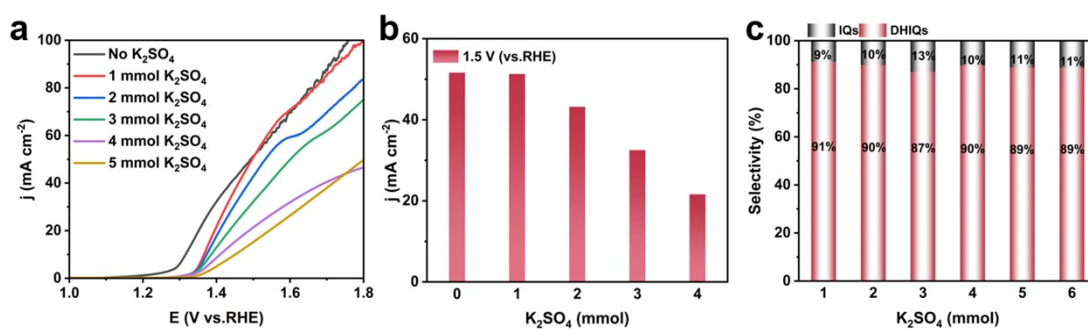

Fig. S14 (a) LSV curves at different  $K_2SO_4$  contents; (b) difference in current density at different  $K_2SO_4$  contents; (c) Selectivity at different  $K_2SO_4$  contents.



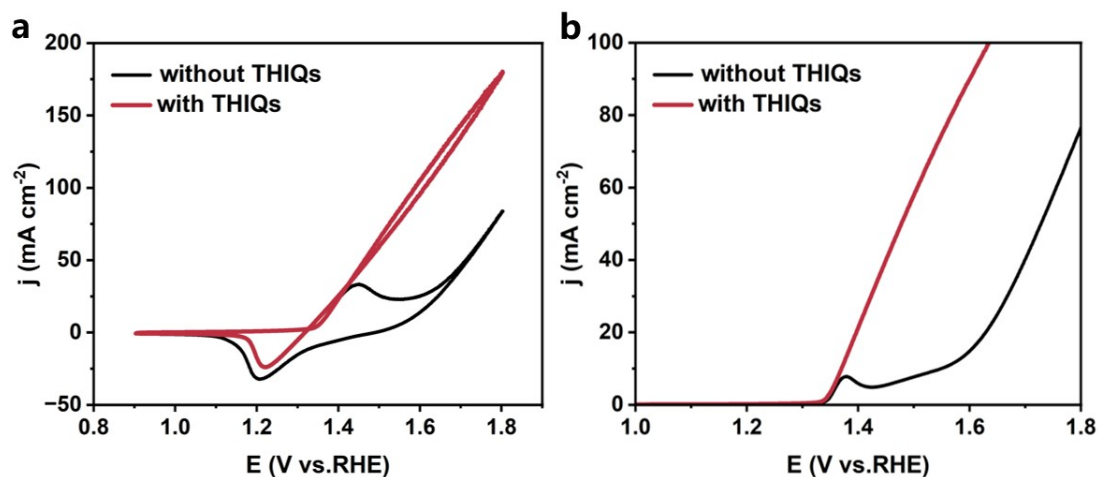

**Fig. S15** (a) CV and (b) LSV curves collected on the  $\text{Cu}_2\text{S}$  anode with 1.0 M KOH in the presence or absence of Urea.

**Tab. S1** Performance comparison of the dehydrogenation reaction.

| Catalysts                              | Catalytic types  | Reaction time | Reaction temperature | Conversion | Yield [%] |      | Refs.     |
|----------------------------------------|------------------|---------------|----------------------|------------|-----------|------|-----------|
|                                        |                  |               |                      |            | DHIQs     | IQs  |           |
| MOF-253- $\text{Ru}(\text{dcbpy})_2$   | photocatalysis   | 5 days        | room temperature     | 91.1       | 78.3      | 8.0  | 1         |
| DMF                                    | thermocatalysis  | 24 h          | 100 °C               | >95        | 84        | /    | 2         |
| $\text{MoS}_2/\text{ZnIn}_2\text{S}_4$ | photocatalysis   | 12 h          | room temperature     | 94         | 85        | 9    | 3         |
| $\text{TiO}_2$                         | photocatalysis   | 24 h          | room temperature     | 100        | 93        | /    | 4         |
| $\text{Ni}_2\text{P}$                  | electrocatalysis | 1 h           | room temperature     | >99        | 99        | /    | 5         |
| $\text{Ni-NSA-V}_{\text{Ni}}$          | electrocatalysis | /             | room temperature     | 98         | 98        | 0    | 6         |
| $\text{Co}_3\text{O}_4@\text{NF}$      | electrocatalysis | 1 h           | room temperature     | 81         | 72        | /    | 7         |
| $\text{Ni}_3\text{N}$                  | electrocatalysis | 1 h           | room temperature     | 100        | 79        | 21   | 8         |
| $\text{NiMo-P}$                        | electrocatalysis | 1 h           | room temperature     | 100        | 80.2      | 19.8 | 9         |
| $\text{Cu}_2\text{S}$                  | electrocatalysis | 2.8 h         | room temperature     | 100        | 90        | 10   | This work |

**Tab. S2** Gibbs free energy of the reaction steps.

| Step                         | $\Delta G/eV$ |
|------------------------------|---------------|
| CuOOH+THIQ→*THIQ             | -1.37         |
| *THIQ-H→*THIQ <sub>ads</sub> | 0.01          |
| *THIQ-H→*DHIQ                | 0.39          |
| *DHIQ-H→*DHIQ <sub>ads</sub> | -1.18         |
| *DHIQ <sub>ads</sub> -H→*IQ  | 2.46          |

\*: adsorption; ads: Intermediate state.

## References

- 1 X. Deng, Y. Qin, M. Hao and Z. Li, MOF-253-Supported Ru Complex for Photocatalytic CO<sub>2</sub> Reduction by Coupling with Semidehydrogenation of 1,2,3,4-Tetrahydroisoquinoline (THIQ), *Inorg. Chem.*, 2019, **58**, 16574-16580.
- 2 A. Mollar-Cuni, D. Ventura-Espinosa, S. Martín, H. García and J. A. Mata, Reduced Graphene Oxides as Carbocatalysts in Acceptorless Dehydrogenation of N-Heterocycles, *ACS Catal*, 2021, **11**, 14688-14693.
- 3 M. Hao, X. Deng, L. Xu and Z. Li, Noble metal Free MoS<sub>2</sub>/ZnIn<sub>2</sub>S<sub>4</sub> nanocomposite for acceptorless photocatalytic semi-dehydrogenation of 1,2,3,4-tetrahydroisoquinoline to produce 3,4-dihydroisoquinoline, *Appl Catal B-Environ*, 2019, **252**, 18-23.
- 4 N. O. Balayeva, N. Zheng, R. Dillert and D. W. Bahnemann, Visible-Light-Mediated Photocatalytic Aerobic Dehydrogenation of N-heterocycles by Surface-Grafted TiO<sub>2</sub> and 4-amino-TEMPO, *ACS Catal*, 2019, **9**, 10694-10704.
- 5 C. Huang, Y. Huang, C. Liu, Y. Yu and B. Zhang, Integrating Hydrogen Production with Aqueous Selective Semi-Dehydrogenation of Tetrahydroisoquinolines over a Ni<sub>2</sub>P Bifunctional Electrode, *Angew Chem Int Ed*, 2019, **58**, 12014-12017.
- 6 C. Wang, W. Zhou, Z. Sun, Y. Wang, B. Zhang and Y. Yu, Integrated selective nitrite reduction to ammonia with tetrahydroisoquinoline semi-dehydrogenation over a vacancy-rich Ni bifunctional electrode, *J Mater Chem A*, 2021, **9**, 239-243.
- 7 M. Xiang, Z. Xu, J. Wang, X. Yang and Z. Yan, Accelerating H<sub>2</sub> Evolution by Anodic

- Semi-dehydrogenation of Tetrahydroisoquinolines in Water over  $\text{Co}_3\text{O}_4$  Nanoribbon Arrays Decorated Nickel Foam, 2021, **27**, 7502-7506.
- 8 R. Zhang, N. Chen, T. Ning, Y. Zhang, Y. Ling, X. Wang, W. Zhu and G. Zhu, Branched Porous  $\text{Ni}_3\text{N}$  as a Catalytic Electrode for Selective Semidehydrogenation of Tetrahydroisoquinoline, *Inorg. Chem.*, 2023, **62**, 17433-17443.
- 9 N. Chen, R. Zhang, W. Sun, Y. Zhang, S. Li, Q. Zhang, H. Yang, Y. Deng, Y. Ling and G. Zhu, Surface Reconstruction for Selective Oxidation of Tetrahydroisoquinoline, *Inorg. Chem.*, 2024, **63**, 8977-8987.
